# Supplementary material for: Patients With Nonobstructive Coronary Artery Disease and Chest Pain: Impact of Obesity and Depressive Symptoms
Source: PubMed Central journal article supplement — J Am Heart Assoc. 2024 Sep 30;13(19):e031429. doi: 10.1161/JAHA.123.031429 (PMC11681450; doi:10.1161/jaha.123.031429), 2024-09-30
Supplement: JAH3-13-e031429-s001.pdf [file JAH3-13-e031429-s001.pdf]

# **SUPPLEMENTAL MATERIAL**

**Figure S1. Pooled Logarithmic Interaction Effects between Obesity and Demographics, Cardiovascular Disease Risk Factors, Social Determinants of Health, and Depression on Chest Pain Prevalence.**

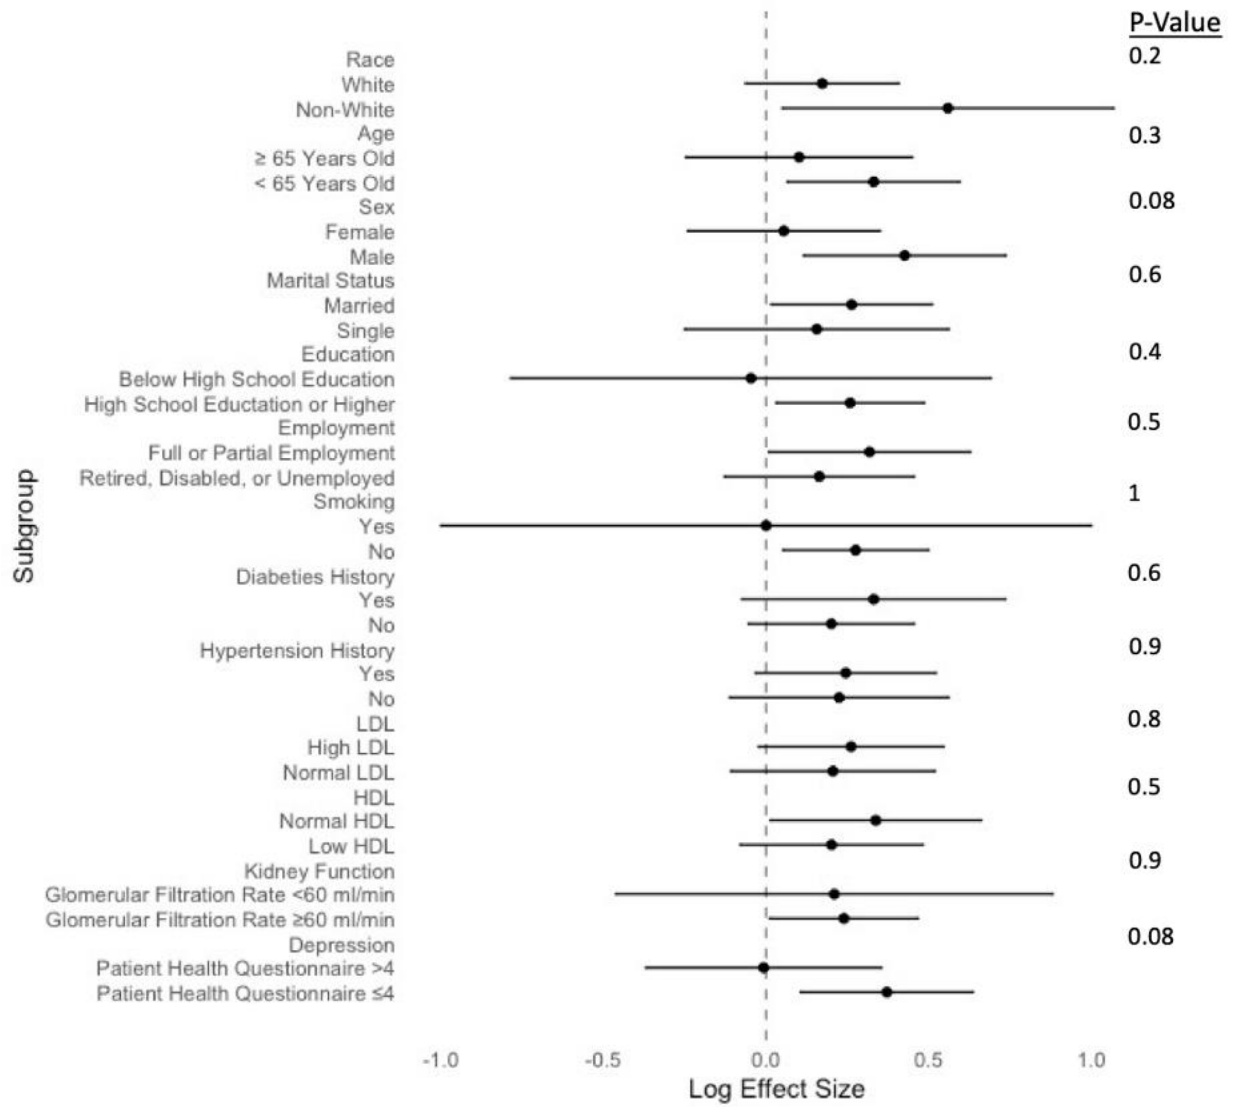

All interaction effects are adjusted for demographics, cardiovascular risk factors, social determinants of health, depressive symptoms, and medications. Significant adjusted interaction effects are those with p-value <0.1. LDL – Low Density Lipoprotein; HDL – High Density Lipoprotein.
